# Supplementary material for: Einarbeitungskonzept für Mitarbeiter:innen einer Hochschulambulanz: Entwicklung und Evaluation eines strukturierten Einarbeitungskonzeptes
Source: Springer Nature journal article supplement (doi:10.1007/s00347-023-01877-7), 2023-05-24
Supplement: MOESM1 [file 25399524]

Bitte ankreuzen:

|                          |                                           |
|--------------------------|-------------------------------------------|
| <input type="checkbox"/> | Student*in (PJ/Famulatur)                 |
| <input type="checkbox"/> | Ambulanzpflege                            |
| <input type="checkbox"/> | OP-/Stationspflege                        |
| <input type="checkbox"/> | Weiterbildungsassistent*in im 1. Jahr     |
| <input type="checkbox"/> | Weiterbildungsassistent*in ab dem 2. Jahr |

# Fragebogen zur Erfassung des Lernerfolgs nach der Einarbeitung in der Ambulanz

Bitte kreuzen Sie die zutreffende Aussage an.

## A. Spezifische Kompetenzen

| 1. Anmeldung - Information                                                      |                      |             |         |                             |                            |                       |             |         |                             |                            |
|---------------------------------------------------------------------------------|----------------------|-------------|---------|-----------------------------|----------------------------|-----------------------|-------------|---------|-----------------------------|----------------------------|
|                                                                                 | Vor der Einarbeitung |             |         |                             |                            | Nach der Einarbeitung |             |         |                             |                            |
| Skills                                                                          | Keine Kenntnisse     | Theoretisch | Gesehen | Unter Aufsicht durchführbar | Selbstständig durchführbar | Keine Kenntnisse      | Theoretisch | Gesehen | Unter Aufsicht durchführbar | Selbstständig durchführbar |
| Anmeldeprozess aus Patientensicht                                               |                      |             |         |                             |                            |                       |             |         |                             |                            |
| Aufgaben des Informationsschalters                                              |                      |             |         |                             |                            |                       |             |         |                             |                            |
| 2. Anmeldung – Stützpunkt 1 am Wartebereich 1                                   |                      |             |         |                             |                            |                       |             |         |                             |                            |
|                                                                                 | Vor der Einarbeitung |             |         |                             |                            | Nach der Einarbeitung |             |         |                             |                            |
| Skills                                                                          | Keine Kenntnisse     | Theoretisch | Gesehen | Unter Aufsicht durchführbar | Selbstständig durchführbar | Keine Kenntnisse      | Theoretisch | Gesehen | Unter Aufsicht durchführbar | Selbstständig durchführbar |
| Bedienung der „Visus“-Plattform (ARGOS)                                         |                      |             |         |                             |                            |                       |             |         |                             |                            |
| Erhebung des Fernvisus                                                          |                      |             |         |                             |                            |                       |             |         |                             |                            |
| Erhebung des Augeninnendrucks und der Pachymetrie mittels Non-Contact-Tonometer |                      |             |         |                             |                            |                       |             |         |                             |                            |
| Sichere Orientierung in der Ambulanz                                            |                      |             |         |                             |                            |                       |             |         |                             |                            |
| 3. OCT                                                                          |                      |             |         |                             |                            |                       |             |         |                             |                            |
|                                                                                 | Vor der Einarbeitung |             |         |                             |                            | Nach der Einarbeitung |             |         |                             |                            |
| Skills                                                                          | Keine Kenntnisse     | Theoretisch | Gesehen | Unter Aufsicht durchführbar | Selbstständig durchführbar | Keine Kenntnisse      | Theoretisch | Gesehen | Unter Aufsicht durchführbar | Selbstständig durchführbar |
| Durchführung eines Makula-OCTs                                                  |                      |             |         |                             |                            |                       |             |         |                             |                            |
| Durchführung eines Papillen-OCTs (RNFL)                                         |                      |             |         |                             |                            |                       |             |         |                             |                            |
| Archivierung im EyeExplorer                                                     |                      |             |         |                             |                            |                       |             |         |                             |                            |
| 4. Fotografie                                                                   |                      |             |         |                             |                            |                       |             |         |                             |                            |
|                                                                                 | Vor der Einarbeitung |             |         |                             |                            | Nach der Einarbeitung |             |         |                             |                            |
| Skills                                                                          | Keine Kenntnisse     | Theoretisch | Gesehen | Unter Aufsicht durchführbar | Selbstständig durchführbar | Keine Kenntnisse      | Theoretisch | Gesehen | Unter Aufsicht durchführbar | Selbstständig durchführbar |
| Aufnahme eines Spaltlampenfotos                                                 |                      |             |         |                             |                            |                       |             |         |                             |                            |

|                                                                                        |                             |             |         |                             |                            |                              |             |         |                             |                            |
|----------------------------------------------------------------------------------------|-----------------------------|-------------|---------|-----------------------------|----------------------------|------------------------------|-------------|---------|-----------------------------|----------------------------|
| Aufnahme eines OPTOS-Fundusfotos                                                       |                             |             |         |                             |                            |                              |             |         |                             |                            |
| Archivierung der Fotos                                                                 |                             |             |         |                             |                            |                              |             |         |                             |                            |
| Durchführung einer Fluoreszenzangiographie                                             |                             |             |         |                             |                            |                              |             |         |                             |                            |
| <b>5. Perimetrie</b>                                                                   |                             |             |         |                             |                            |                              |             |         |                             |                            |
|                                                                                        | <b>Vor der Einarbeitung</b> |             |         |                             |                            | <b>Nach der Einarbeitung</b> |             |         |                             |                            |
| Skills                                                                                 | Keine Kenntnisse            | Theoretisch | Gesehen | Unter Aufsicht durchführbar | Selbstständig durchführbar | Keine Kenntnisse             | Theoretisch | Gesehen | Unter Aufsicht durchführbar | Selbstständig durchführbar |
| Durchführung einer statischen Perimetrie (Octopus)                                     |                             |             |         |                             |                            |                              |             |         |                             |                            |
| Durchführung einer kinetischen Perimetrie (Goldmann)                                   |                             |             |         |                             |                            |                              |             |         |                             |                            |
| <b>6. Behandlungsraum</b>                                                              |                             |             |         |                             |                            |                              |             |         |                             |                            |
|                                                                                        | <b>Vor der Einarbeitung</b> |             |         |                             |                            | <b>Nach der Einarbeitung</b> |             |         |                             |                            |
| Skills                                                                                 | Keine Kenntnisse            | Theoretisch | Gesehen | Unter Aufsicht durchführbar | Selbstständig durchführbar | Keine Kenntnisse             | Theoretisch | Gesehen | Unter Aufsicht durchführbar | Selbstständig durchführbar |
| Orientierung und Lokalisation wichtiger Instrumente und Medikamente im Behandlungsraum |                             |             |         |                             |                            |                              |             |         |                             |                            |
| <b>7. Untersuchungsraum</b>                                                            |                             |             |         |                             |                            |                              |             |         |                             |                            |
|                                                                                        | <b>Vor der Einarbeitung</b> |             |         |                             |                            | <b>Nach der Einarbeitung</b> |             |         |                             |                            |
| Skills                                                                                 | Keine Kenntnisse            | Theoretisch | Gesehen | Unter Aufsicht durchführbar | Selbstständig durchführbar | Keine Kenntnisse             | Theoretisch | Gesehen | Unter Aufsicht durchführbar | Selbstständig durchführbar |
| Lokalisation wichtiger Dokumente im Untersuchungsraum                                  |                             |             |         |                             |                            |                              |             |         |                             |                            |
| Lokalisation der Instrumente für Bettkonsile                                           |                             |             |         |                             |                            |                              |             |         |                             |                            |
| Kenntnis wichtiger interner Dokumente zum Ablauf ärztlicher Aufgaben                   |                             |             |         |                             |                            |                              |             |         |                             |                            |
| Bedienung des KV-Rechners                                                              |                             |             |         |                             |                            |                              |             |         |                             |                            |
| Ausstellung einer Arbeitsunfähigkeitsbescheinigung                                     |                             |             |         |                             |                            |                              |             |         |                             |                            |
| <b>8. Pentacam/ Endothelzellfoto/ Vorderabschnitts-OCT</b>                             |                             |             |         |                             |                            |                              |             |         |                             |                            |
|                                                                                        | <b>Vor der Einarbeitung</b> |             |         |                             |                            | <b>Nach der Einarbeitung</b> |             |         |                             |                            |
| Skills                                                                                 | Keine Kenntnisse            | Theoretisch | Gesehen | Unter Aufsicht durchführbar | Selbstständig durchführbar | Keine Kenntnisse             | Theoretisch | Gesehen | Unter Aufsicht durchführbar | Selbstständig durchführbar |
| Durchführung einer Hornhauttopographie (Pentacam)                                      |                             |             |         |                             |                            |                              |             |         |                             |                            |

|                                                                 |                             |             |         |                             |                            |                              |             |         |                             |                            |
|-----------------------------------------------------------------|-----------------------------|-------------|---------|-----------------------------|----------------------------|------------------------------|-------------|---------|-----------------------------|----------------------------|
| Durchführung einer Endothelzellmessung                          |                             |             |         |                             |                            |                              |             |         |                             |                            |
| Durchführung eines Vorderabschnitt-OCT (Orbscan)                |                             |             |         |                             |                            |                              |             |         |                             |                            |
| <b>9. Ambulanz-Operationssaal</b>                               |                             |             |         |                             |                            |                              |             |         |                             |                            |
|                                                                 | <b>Vor der Einarbeitung</b> |             |         |                             |                            | <b>Nach der Einarbeitung</b> |             |         |                             |                            |
| Skills                                                          | Keine Kenntnisse            | Theoretisch | Gesehen | Unter Aufsicht durchführbar | Selbstständig durchführbar | Keine Kenntnisse             | Theoretisch | Gesehen | Unter Aufsicht durchführbar | Selbstständig durchführbar |
| Steriles Einkleiden                                             |                             |             |         |                             |                            |                              |             |         |                             |                            |
| Lokalisation wichtiger Utensilien für die Lid-und Bindehautnaht |                             |             |         |                             |                            |                              |             |         |                             |                            |
| <b>10. Aufnahmemanagement</b>                                   |                             |             |         |                             |                            |                              |             |         |                             |                            |
|                                                                 | <b>Vor der Einarbeitung</b> |             |         |                             |                            | <b>Nach der Einarbeitung</b> |             |         |                             |                            |
| Skills                                                          | Keine Kenntnisse            | Theoretisch | Gesehen | Unter Aufsicht durchführbar | Selbstständig durchführbar | Keine Kenntnisse             | Theoretisch | Gesehen | Unter Aufsicht durchführbar | Selbstständig durchführbar |
| Aufgaben des Aufnahmemanagements                                |                             |             |         |                             |                            |                              |             |         |                             |                            |
| Anlegen einer Meona-Kurve                                       |                             |             |         |                             |                            |                              |             |         |                             |                            |

## B. Allgemeine Kompetenzen

Durch die Einarbeitung ...

|                                                                                                                                                 | Stimme gar nicht zu | Stimme eher nicht zu | Unentschieden | Stimme eher zu | Stimme voll zu |
|-------------------------------------------------------------------------------------------------------------------------------------------------|---------------------|----------------------|---------------|----------------|----------------|
| ... habe ich neue Kollegen kennengelernt.                                                                                                       |                     |                      |               |                |                |
| ... neue Kompetenzen erlernt, die mir vorher noch nicht bekannt waren.                                                                          |                     |                      |               |                |                |
| ... habe ich Kompetenzen erworben, die es mir in Zukunft ermöglichen werden, die Abläufe aus Patientensicht besser zu verstehen.                |                     |                      |               |                |                |
| ... habe ich Kompetenzen erworben, die es mir in Zukunft ermöglichen werden, Fragen der Patienten bezüglich des Ablaufes besser zu beantworten. |                     |                      |               |                |                |
| ... habe ich Kompetenzen erworben, die es mir in Zukunft ermöglichen werden, mit meinen Kollegen besser zu kommunizieren.                       |                     |                      |               |                |                |
| ... habe ich Kompetenzen erworben, die es mir in Zukunft ermöglichen werden, die Arbeit meiner Kollegen besser zu verstehen.                    |                     |                      |               |                |                |
| ... habe ich Kompetenzen erworben, die es mir in Zukunft ermöglichen werden, meine Kollegen besser bei ihrer Arbeit zu unterstützen.            |                     |                      |               |                |                |
| ... habe ich Kompetenzen erworben, die mir selbst die Verrichtung meiner Arbeit in Zukunft vereinfachen werden.                                 |                     |                      |               |                |                |
